# Supplementary material for: Exploring the mechanism of how tvMyb2 recognizes and binds ap65-1 by molecular dynamics simulations and free energy calculations
Source: Royal Society of Chemistry journal article supplement (doi:10.1039/c5mb00585j), 2015-10-16

**Table S1.1 Decomposition energy of the DNA molecular. (Kcal·mol<sup>-1</sup>)**

|               | <b>3OSF</b> | <b>K51A</b> | <b>R84A</b> | <b>R87A</b> |
|---------------|-------------|-------------|-------------|-------------|
| <b>C(-3')</b> | 0.447       | 0.381       | 0.35        | 0.437       |
| <b>T(-2')</b> | 1.215       | 0.317       | 1.155       | -0.172      |
| <b>G(-1')</b> | 1.849       | 1.374       | 1.979       | -1.902      |
| <b>T(1')</b>  | -2.16       | 0.664       | 0.454       | 0.78        |
| <b>A(2')</b>  | -2.894      | -2.117      | -4.581      | -4.573      |
| <b>T(3')</b>  | -9.27       | -4.353      | -8.31       | -6.424      |
| <b>C(4')</b>  | -3.287      | -1.118      | -0.526      | -1.466      |
| <b>G(5')</b>  | -5.795      | -5.036      | 0.605       | -1.16       |
| <b>T(6')</b>  | -0.815      | -0.936      | 0.047       | -2.796      |
| <b>C(7')</b>  | 0.132       | 0.174       | 0.235       | 0.345       |
| <b>T(8')</b>  | 0.091       | 0.139       | 0.193       | 0.071       |
| <b>T(9')</b>  | 0.179       | 0.219       | 0.266       | 0.142       |
| <b>G(10')</b> | 0.2         | 0.211       | 0.228       | 0.186       |
| <b>C(-4)</b>  | 0.027       | 0.135       | 0.115       | 0.003       |
| <b>A(-3)</b>  | -0.443      | -0.255      | 0.119       | 0.507       |
| <b>A(-2)</b>  | 0.86        | 1.725       | 1.353       | 4.448       |
| <b>G(-1)</b>  | -0.02       | 1.399       | 1.924       | -2.284      |
| <b>A(1)</b>   | 3.597       | 2.143       | 2.066       | 3.458       |
| <b>C(2)</b>   | 4.137       | 3.660       | 1.628       | -0.764      |
| <b>G(3)</b>   | -7.122      | -7.263      | -6.524      | -6.402      |
| <b>A(4)</b>   | 0.585       | 0.502       | 0.975       | 0.815       |
| <b>T(5)</b>   | -1.493      | -2.649      | -3.113      | -3.169      |
| <b>A(6)</b>   | -9.858      | -6.465      | -6.932      | -6.887      |
| <b>C(7)</b>   | -3.2        | -1.182      | -1.893      | -1.921      |
| <b>A(8)</b>   | 0.763       | 1.057       | 0.621       | 0.668       |
| <b>G(9)</b>   | 0.611       | 0.486       | 0.356       | 0.325       |
| <b>Total</b>  | -31.664     | -16.788     | -17.21      | -27.735     |

**Table S1.2 Decomposition energy of the DNA backbone. (Kcal·mol<sup>-1</sup>)**

|               | <b>3OSF</b> | <b>K51A</b> | <b>R84A</b> | <b>R87A</b> |
|---------------|-------------|-------------|-------------|-------------|
| <b>C(-3')</b> | 0.328       | 0.283       | 0.278       | 0.294       |
| <b>T(-2')</b> | 1.408       | 0.551       | 1.586       | 0.062       |
| <b>G(-1')</b> | 1.275       | 1.884       | 2.369       | -1.18       |
| <b>T(1')</b>  | 3.268       | 2.819       | 2.668       | 3.177       |
| <b>A(2')</b>  | -0.864      | 2.375       | 0.23        | 0.092       |
| <b>T(3')</b>  | -3.313      | 1.045       | -0.276      | 1.011       |
| <b>C(4')</b>  | -1.528      | 0.997       | 0.137       | -0.711      |
| <b>G(5')</b>  | 0.97        | 1.249       | 0.79        | 0.807       |
| <b>T(6')</b>  | 0.096       | 0.119       | 0.115       | 0.076       |
| <b>C(7')</b>  | 0.065       | 0.104       | 0.139       | 0.018       |
| <b>T(8')</b>  | 0.167       | 0.221       | 0.247       | 0.105       |
| <b>T(9')</b>  | 0.22        | 0.264       | 0.293       | 0.162       |
| <b>G(10')</b> | 0.184       | 0.197       | 0.217       | 0.154       |
| <b>C(-4)</b>  | -0.04       | 0.066       | 0.042       | -0.075      |
| <b>A(-3)</b>  | -0.508      | -0.29       | 0.09        | 0.517       |
| <b>A(-2)</b>  | 0.705       | 1.61        | 1.315       | 4.609       |
| <b>G(-1)</b>  | 0.415       | 1.788       | 2.217       | -0.182      |
| <b>A(1)</b>   | 3.392       | 1.924       | 2.254       | 3.021       |
| <b>C(2)</b>   | 4.459       | 4.243       | 3.132       | 0.193       |
| <b>G(3)</b>   | -2.618      | -2.011      | 0.05        | -0.105      |
| <b>A(4)</b>   | 0.881       | 0.885       | 0.69        | 0.63        |
| <b>T(5)</b>   | 0.807       | 0.222       | 0.28        | 0.308       |
| <b>A(6)</b>   | -8.208      | -5.467      | -6.169      | -6.112      |
| <b>C(7)</b>   | 0.088       | -0.908      | -1.312      | -1.293      |
| <b>A(8)</b>   | 0.798       | 1.073       | 0.66        | 0.668       |
| <b>G(9)</b>   | 0.62        | 0.472       | 0.333       | 0.343       |
| <b>Total</b>  | 3.067       | 15.715      | 12.375      | 6.589       |

**Table S1.3 Decomposition energy of the DNA base. (Kcal·mol<sup>-1</sup>)**

|               | <b>3OSF</b> | <b>K51A</b> | <b>R84A</b> | <b>R87A</b> |
|---------------|-------------|-------------|-------------|-------------|
| <b>C(-3')</b> | 0.119       | 0.098       | 0.072       | 0.142       |
| <b>T(-2')</b> | -0.193      | -0.234      | -0.431      | -0.235      |
| <b>G(-1')</b> | 0.574       | -0.51       | -0.39       | -0.721      |
| <b>T(1')</b>  | -5.429      | -2.156      | -2.214      | -2.397      |
| <b>A(2')</b>  | -2.03       | -4.492      | -4.811      | -4.665      |
| <b>T(3')</b>  | -5.957      | -5.398      | -8.033      | -7.435      |
| <b>C(4')</b>  | -1.759      | -2.115      | -0.663      | -0.755      |
| <b>G(5')</b>  | -6.765      | -6.285      | -0.184      | -1.967      |
| <b>T(6')</b>  | -0.911      | -1.056      | -0.068      | -2.872      |
| <b>C(7')</b>  | 0.067       | 0.07        | 0.096       | 0.327       |
| <b>T(8')</b>  | -0.076      | -0.082      | -0.054      | -0.035      |
| <b>T(9')</b>  | -0.041      | -0.044      | -0.027      | -0.02       |
| <b>G(10')</b> | 0.016       | 0.014       | 0.011       | 0.032       |
| <b>C(-4)</b>  | 0.066       | 0.068       | 0.073       | 0.078       |
| <b>A(-3)</b>  | 0.064       | 0.035       | 0.029       | -0.009      |
| <b>A(-2)</b>  | 0.155       | 0.115       | 0.039       | -0.161      |
| <b>G(-1)</b>  | -0.435      | -0.389      | -0.292      | -2.102      |
| <b>A(1)</b>   | 0.205       | 0.219       | -0.188      | 0.437       |
| <b>C(2)</b>   | -0.323      | -0.583      | -1.504      | -0.957      |
| <b>G(3)</b>   | -4.504      | -5.252      | -6.574      | -6.297      |
| <b>A(4)</b>   | -0.297      | -0.383      | 0.285       | 0.185       |
| <b>T(5)</b>   | -2.301      | -2.871      | -3.393      | -3.476      |
| <b>A(6)</b>   | -1.651      | -0.998      | -0.763      | -0.774      |
| <b>C(7)</b>   | -3.289      | -0.274      | -0.581      | -0.628      |
| <b>A(8)</b>   | -0.035      | -0.017      | -0.039      | 0           |
| <b>G(9)</b>   | -0.009      | 0.014       | 0.024       | -0.019      |
| <b>Total</b>  | -34.739     | -32.506     | -29.58      | -34.324     |

**Table S2.1 Decomposition energy of the important residues in 3OSF system****(Kcal·mol<sup>-1</sup>)**

| Residue       | Van der Waal     | Electrostatic polar | Polar solvation    | Non-polar solv  | Total             |
|---------------|------------------|---------------------|--------------------|-----------------|-------------------|
| <b>LYS 49</b> | -8.099 +/- 1.274 | -324.022 +/- 5.964  | 323.567 +/- 4.801  | -1.285+/-0.063  | -9.838 +/- 9.255  |
| <b>GLN 50</b> | -2.213 +/- 1.723 | 2.674 +/- 5.395     | -3.963 +/- 3.591   | -0.123+/-0.131  | -3.624 +/- 7.786  |
| <b>LYS 51</b> | -5.175 +/- 1.412 | -304.378 +/- 7.123  | 304.665 +/- 6.013  | -1.017+/-0.108  | -5.905 +/-10.630  |
| <b>LYS72</b>  | -0.349 +/- 1.051 | -219.688 +/- 8.631  | 217.332 +/- 7.894  | -0.382+/- 0.110 | -3.087 +/- 12.656 |
| <b>ARG84</b>  | -3.635 +/- 1.538 | -293.138+/- 2.155   | 294.351 +/- 9.213  | -0.898+/-0.091  | -3.320 +/- 16.461 |
| <b>GLN85</b>  | -0.800 +/- 1.633 | -13.849 +/- 3.754   | 8.111 +/- 1.625    | -0.239+/-0.048  | -6.778 +/- 6.066  |
| <b>ARG87</b>  | -2.740 +/- 1.368 | -270.383 +/- 9.842  | 265.887 +/- 8.071  | -0.623+/-0.069  | -7.859 +/- 14.042 |
| <b>ARG89</b>  | -1.579 +/- 1.618 | -252.728 +/- 8.762  | 244.916 +/- 6.353  | -0.250+/-0.054  | -9.641 +/- 12.460 |
| <b>LYS91</b>  | -0.741 +/- 1.453 | -267.053+/-11.123   | 264.600 +/- 10.679 | -0.415+/- 0.113 | -3.610 +/- 16.168 |
| <b>ARG120</b> | -2.184 +/- 1.266 | -257.916 +/- 7.002  | 251.568 +/- 4.890  | -0.479+/-0.139  | -9.011 +/- 10.391 |
| <b>GLN121</b> | -0.947 +/- 1.296 | -6.207 +/- 4.191    | 3.271 +/- 2.981    | -0.079+/-0.073  | -3.962 +/- 6.766  |
| <b>TRP122</b> | -2.688 +/- 1.415 | -18.715 +/- 2.343   | 12.923 +/- 1.262   | -0.204+/-0.057  | -8.684 +/- 5.827  |
| <b>ALA123</b> | -1.777 +/- 0.891 | -9.207 +/- 3.978    | 6.885 +/- 2.340    | -0.397+/-0.089  | -4.495 +/- 5.646  |
| <b>ASN139</b> | -3.435 +/- 1.173 | -4.455 +/- 3.916    | 4.183 +/- 2.400    | -0.677+/-0.044  | -4.384 +/- 6.388  |
| <b>ASN146</b> | -1.256 +/- 0.991 | -14.101 +/- 4.716   | 12.513 +/- 3.070   | -0.428+/-0.072  | -3.273 +/- 7.110  |

**Table S2.2 Decomposition energy of the important residues in K51A system.****(Kcal·mol<sup>-1</sup>)**

| Residue       | Van der Waal   | Electrostatic polar | Polar solvation  | Non-polar solv | Total            |
|---------------|----------------|---------------------|------------------|----------------|------------------|
| <b>LYS49</b>  | -6.980+/-1.198 | -329.905+/-6.749    | 327.781+/- 5.947 | -1.355+/-0.056 | -10.458+/-10.361 |
| <b>ALA51</b>  | -1.267+/-0.890 | -9.391+/- 3.526     | 5.847+/- 1.768   | -0.238+/-0.077 | -5.049+/- 5.239  |
| <b>ARG81</b>  | -0.338+/-1.980 | -232.381+/- 8.955   | 229.578+/-5.980  | -0.001+/-0.048 | -3.142+/-12.611  |
| <b>ARG84</b>  | -3.849+/-1.380 | -295.634+/- 8.218   | 296.935+/- 5.983 | -0.905+/-0.068 | -3.454+/- 1.779  |
| <b>GLN85</b>  | -0.669+/-1.384 | -15.256+/- 3.156    | 9.334+/- 1.466   | -0.185+/-0.049 | -6.776+/- 5.349  |
| <b>ARG87</b>  | -3.012+/-1.364 | -271.462+/- 8.101   | 266.930+/- 5.882 | -0.629+/-0.066 | -8.172+/-11.610  |
| <b>ARG89</b>  | -0.986+/-1.647 | -252.086+/- 8.517   | 244.639+/- 5.235 | -0.235+/-0.053 | -8.667+/-11.614  |
| <b>LYS91</b>  | -1.351+/-1.292 | -279.153+/-10.267   | 276.788+/- 9.752 | -0.511+/-0.130 | -4.228+/-14.973  |
| <b>ARG120</b> | -2.083+/-1.225 | -257.362+/- 6.947   | 250.711+/- 5.046 | -0.480+/-0.128 | -9.215+/-0.371   |
| <b>GLN121</b> | -0.991+/-1.252 | -6.080+/- 4.771     | 2.943+/- 3.605   | -0.100+/-0.071 | -4.228+/- 7.394  |
| <b>TRP122</b> | -2.800+/-1.326 | -18.613+/- 2.556    | 12.954+/- 1.266  | -0.209+/-0.055 | -8.668+/- 5.741  |
| <b>ALA123</b> | -1.668+/-0.829 | -9.164+/- 2.293     | 7.009+/-1.629    | -0.394+/-0.086 | -4.217+/- 4.404  |
| <b>ILE135</b> | -2.409+/-1.443 | 0.704+/- 2.414      | -0.981+/- 0.888  | -0.341+/-0.043 | -3.027+/- 5.099  |
| <b>ASN139</b> | -3.194+/-1.035 | -4.845+/- 3.499     | 3.772+/- 1.621   | -0.625+/-0.039 | -4.892+/- 5.833  |
| <b>ASN146</b> | -1.176+/-1.194 | -12.334+/-4.557     | 10.543+/- 3.536  | -0.423+/-0.095 | -3.390+/- 7.439  |

**Table S2.3 Decomposition energy of the important residues in R84A system.****(Kcal·mol<sup>-1</sup>)**

| Residue       | Van der Waal    | Electrostatic polar | Polar solvation   | Non-polar solv | Total           |
|---------------|-----------------|---------------------|-------------------|----------------|-----------------|
| <b>LYS49</b>  | -6.731+/- 1.195 | -324.232+/- 6.969   | 323.913+/- 5.583  | -1.362+/-0.064 | -8.413+/- 0.318 |
| <b>LYS51</b>  | -3.885+/- 1.050 | -271.036+/- 9.580   | 270.113+/- 9.214  | -0.745+/-0.155 | -5.553+/-14.367 |
| <b>GLN85</b>  | -1.023+/- 1.538 | -13.391+/- 3.297    | 8.378+/- 1.535    | -0.323+/-0.088 | -6.359+/-5.758  |
| <b>ARG87</b>  | -2.867+/- 1.308 | -274.318+/- 8.189   | 269.560+/- 6.250  | -0.645+/-0.087 | -8.269+/-11.924 |
| <b>ASP88</b>  | -1.143+/- 1.346 | 274.470+/-11.600    | -269.831+/- 5.365 | -0.212+/-0.073 | 3.284+/-14.776  |
| <b>ARG89</b>  | -1.418+/- 1.849 | -250.652+/- 8.309   | 242.400+/- 6.726  | -0.228+/-0.056 | -9.898+/- 2.214 |
| <b>LYS91</b>  | -1.602+/- 1.274 | -281.378+/-11.720   | 279.028+/-11.860  | -0.554+/-0.128 | -4.506+/- 7.302 |
| <b>ARG120</b> | -2.362+/- 1.433 | -256.658+/- 8.916   | 250.759+/- 7.847  | -0.486+/-0.136 | -8.748+/-13.260 |
| <b>GLN121</b> | -1.364+/- 1.261 | -5.774+/- 4.376     | 2.424+/- 3.147    | -0.126+/-0.082 | -4.839+/- 7.141 |
| <b>TRP122</b> | -2.795+/- 1.334 | -20.062+/- 3.111    | 14.715+/- 1.316   | -0.235+/-0.032 | -8.376+/- 6.175 |
| <b>ALA123</b> | -1.484+/- 0.742 | -10.353+/- 2.495    | 7.811+/- 1.850    | -0.361+/-0.073 | -4.387+/- 4.514 |
| <b>ASP134</b> | -1.203+/- 1.310 | 267.164+/- 9.347    | -262.681+/- 8.014 | -0.144+/-0.083 | 3.136+/-13.287  |
| <b>LYS138</b> | -3.084+/- 1.174 | -305.716+/- 5.631   | 312.663+/- 5.082  | -0.635+/-0.044 | 3.228+/- 8.965  |
| <b>ASN139</b> | -3.274+/- 1.085 | -3.309+/- 3.224     | 2.548+/- 1.431    | -0.602+/-0.047 | -4.636+/- 5.658 |

**Table S2.4 Decomposition energy of the important residues in R87A system.****(Kcal·mol<sup>-1</sup>)**

| Residue       | Van der Waal    | Electrostatic polar | Polar solvation  | Non-polar solv | Total             |
|---------------|-----------------|---------------------|------------------|----------------|-------------------|
| <b>LYS49</b>  | -6.819+/- 1.261 | -320.894+/- 6.621   | 321.411+/- 6.028 | -1.406+/-0.066 | -7.707 +/- 10.331 |
| <b>LYS51</b>  | -3.720+/- 0.984 | -271.460+/-7.918    | 269.870+/- 7.149 | -0.728+/-0.137 | -6.039+/- 12.046  |
| <b>GLN85</b>  | -0.967+/- 1.508 | -14.580+/- 2.826    | 9.795+/- 1.444   | -0.329+/-0.068 | -6.081+/- 5.339   |
| <b>ARG89</b>  | -1.053+/- 1.929 | -243.451+/- 7.796   | 235.444+/- 5.218 | -0.228+/-0.053 | -9.288+/- 11.133  |
| <b>HIE100</b> | -1.080+/- 1.930 | -13.500+/- 4.836    | 11.556+/- 3.259  | -0.231+/-0.196 | -3.255+/- 7.528   |
| <b>ARG120</b> | -1.466+/- 1.366 | -254.426+/- 7.606   | 247.284+/- 5.599 | -0.417+/-0.140 | -9.025+/- 11.152  |
| <b>TRP122</b> | -2.013+/- 1.437 | -16.055+/- 2.534    | 12.882+/- 1.249  | -0.229+/-0.045 | -5.415+/- 5.754   |
| <b>LYS138</b> | -2.665+/- 1.094 | -297.751+/- 5.734   | 304.324+/- 5.556 | -0.592+/-0.043 | 3.317+/- 9.348    |
| <b>ASN139</b> | -3.046+/- 1.160 | -3.664+/- 4.407     | 2.175+/- 1.736   | -0.531+/-0.045 | -5.065+/- 6.620   |
| <b>THR143</b> | -2.627+/- 1.958 | -0.197+/- 4.493     | 0.160+/- 2.541   | -0.399+/-0.075 | -3.064+/- 7.314   |
| <b>ASN146</b> | -1.374+/- 1.515 | -12.879+/- 4.371    | 9.124+/- 2.460   | -0.410+/-0.093 | -5.539+/- 6.932   |
| <b>LYS147</b> | -0.197+/- 1.655 | -231.030+/- 7.855   | 224.470+/- 6.594 | -0.166+/-0.102 | -6.924 +/- 11.461 |

Figure.S1 The important hydrogen bonds between tvMyb2 and ap65-1 in 3OSF system.

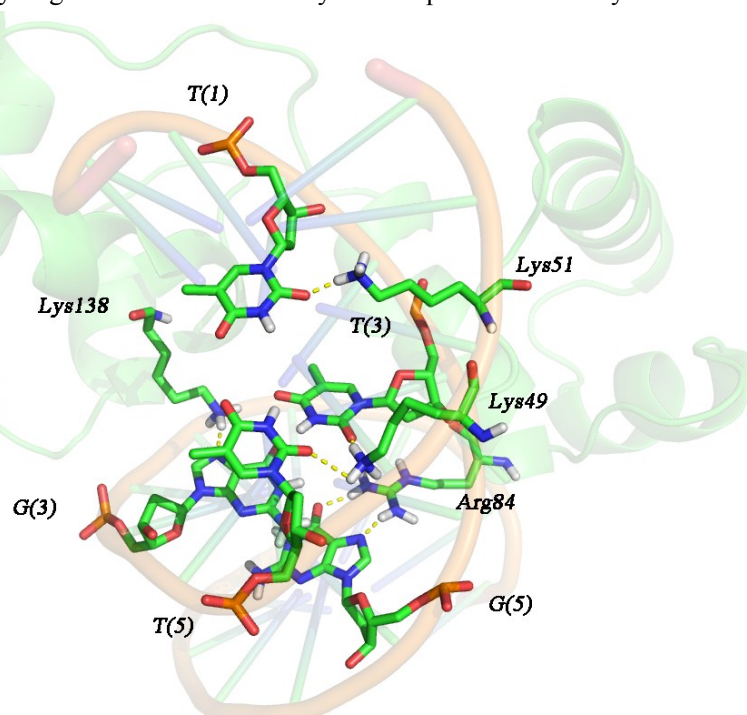

Supplement: c5mb00585j1.pdf [file c5mb00585j1.pdf]
